# Supplementary material
Source: PubMed Central journal article supplement (PMC3217319)
Supplement: tableS2.pdf [file tableS2.pdf]

Supplementary Table 2: Identified Significant Proteins of Random Forests, ANOVA and t-tests.

| Gene                | ID                                                                                   | Spot | q      | Fold Δ | Fold stage       | Season Δ | GI or Ensembl No. | Species                           | MW (kDa) | Score | Amino Acid Coverage |           | # Pep. | Human     | Function                                |
|---------------------|--------------------------------------------------------------------------------------|------|--------|--------|------------------|----------|-------------------|-----------------------------------|----------|-------|---------------------|-----------|--------|-----------|-----------------------------------------|
|                     |                                                                                      |      |        |        |                  |          |                   |                                   |          |       | %                   | Ratio     |        |           |                                         |
| A2M <sup>†</sup>    | α <sub>2</sub> -Macroglobulin                                                        | 105  | 0.002  | 3.61   | <b>E-Ar:</b> SpD | 2.60 W   | 157954061         | <i>Ictidomys tridecemlineatus</i> | 163      | 69    | 4                   | [65/1463] | 5      | 66932947  | Protease inhibitor                      |
| ACADVL <sup>‡</sup> | Acyl-CoA dehydrogenase, very-long-chain specific, mitochondrial                      | 510  | 0.025  |        |                  | 1.27 W   | 73955386          | <i>Canis familiaris</i>           | 70       | 205   | 31                  | [199/650] | 15     | 4557235   | Fatty acid β-oxidation                  |
| ACO2                | Aconitase 2, mitochondrial                                                           | 309  | 0.010  | 1.43   | <b>LT:</b> FT    |          | 27806769          | <i>Bos Taurus</i>                 | 85       | 135   | 15                  | [104/700] | 10     | 4501867   | TCA cycle                               |
| ACO2                | Aconitase 2, mitochondrial                                                           | 310  | 0.007  | 1.44   | <b>LT:</b> FT    |          | 27806769          | <i>Bos Taurus</i>                 | 85       | 198   | 23                  | [163/700] | 14     | 4501867   | TCA cycle                               |
| ACO2                | Aconitase 2, mitochondrial                                                           | 312  | 0.006  | 1.47   | <b>LT:</b> FT    |          | 74268076          | <i>Bos Taurus</i>                 | 85       | 219   | 25                  | [198/780] | 16     | 4501867   | TCA cycle                               |
| ACO2                | Aconitase 2, mitochondrial                                                           | 316  | 0.007  | 1.43   | <b>LT:</b> FT    |          | 74268076          | <i>Bos Taurus</i>                 | 85       | 374   | 41                  | [317/780] | 26     | 4501867   | TCA cycle                               |
| ACO2                | Aconitase 2, mitochondrial                                                           | 319  | 0.018  | 1.40   | <b>LT:</b> FT    |          | 74268076          | <i>Bos Taurus</i>                 | 85       | 396   | 41                  | [320/780] | 27     | 4501867   | TCA cycle                               |
| ACSS1               | Acetyl-coenzyme A synthetase 2                                                       | 359  | 0.039  | 1.46   | <b>FA:</b> LT    |          | 157818027         | <i>Rattus norvegicus</i>          | 75       | 125   | 19                  | [113/602] | 9      | 28416953  | Carbohydrate metabolism                 |
| ACTC1               | Actin, α cardiac muscle 1                                                            | 870  | 0.021  | 1.91   | <b>Ent:</b> FT   |          | 4885049           | <i>Homo sapiens</i>               | 42       | 139   | 41                  | [121/297] | 10     |           | Cardiac muscle contraction              |
| ALB                 | Albumin                                                                              | 436  | 0.016  | 3.24   | <b>FT:</b> SpD   |          | 30794280          | <i>Bos Taurus</i>                 | 69       | 469   | 52                  | [273/527] | 27     | 4502027   | Lipid binding                           |
| ALB                 | Albumin                                                                              | 462  | 0.020  | 2.49   | <b>FT:</b> SpD   |          | E: 11284          | <i>Ictidomys tridecemlineatus</i> | 69       | 37    | 6                   | [37/606]  | 3      | 4502027   | Lipid binding                           |
| ALB <sup>†</sup>    | Albumin                                                                              | 423  | 0.038  | 2.47   | <b>E-Ar:</b> SpD | 1.73 W   | E: 11284          | <i>Ictidomys tridecemlineatus</i> | 69       | 139   | 11                  | [66/606]  | 7      | 4502027   | Lipid binding                           |
| ALDOC               | Fructose-bisphosphate aldolase C                                                     | 1045 | 0.050  | 1.57   | <b>SpD:</b> Ent  |          | 4885063           | <i>Homo sapiens</i>               | 39       | 30    | 8                   | [23/284]  | 2      |           | Glycolysis and Gluconeogenesis          |
| ANXA5               | Annexin A5                                                                           | 1206 | 0.011  | 1.49   | <b>IBA:</b> SA   |          | 149698420         | <i>Equus caballus</i>             | 36       | 107   | 27                  | [88/321]  | 8      | 4502107   | Regulation of coagulation and apoptosis |
| APOA1 <sup>†</sup>  | Apolipoprotein A-I                                                                   | 1449 | 0.011  | 4.01   | <b>FT:</b> SpD   | 1.83 W   | E: 02077          | <i>Ictidomys tridecemlineatus</i> | 31       | 90    | 23                  | [62/267]  | 6      | 4557321   | Lipid transport                         |
| APOA1 <sup>†</sup>  | Apolipoprotein A-I                                                                   | 1476 | 0.003  | 3.81   | <b>E-Ar:</b> SpD | 2.05 W   | E: 02077          | <i>Ictidomys tridecemlineatus</i> | 31       | 58    | 18                  | [48/267]  | 4      | 4557321   | Lipid transport                         |
| APOA1 <sup>TS</sup> | Apolipoprotein A-I                                                                   | 1486 | 0.007  | 4.38   | <b>FT:</b> SpD   | 2.13 W   | E: 02077          | <i>Ictidomys tridecemlineatus</i> | 31       | 113   | 30                  | [80/267]  | 8      | 4557321   | Lipid transport                         |
| ATP5H <sup>‡</sup>  | ATP synthase subunit d                                                               | 1642 | 0.044  |        |                  | 1.21 S   | 57108097          | <i>Canis familiaris</i>           | 19       | 86    | 39                  | [63/161]  | 6      | 5453559   | ATP synthesis                           |
| BCKDHB <sup>†</sup> | 2-Oxoisovalerate dehydrogenase subunit β                                             | 1144 | 0.009  | 1.37   | <b>SpD:</b> LT   | 1.26 S   | 4557353           | <i>Homo sapiens</i>               | 43       | 95    | 19                  | [58/312]  | 6      |           | Branched chain amino acid catabolism    |
| CCT5 <sup>‡</sup>   | T-complex protein 1 subunit ε                                                        | 526  | 6.E-05 |        |                  | 1.16 W   | 194676636         | <i>Bos Taurus</i>                 | 60       | 104   | 15                  | [80/541]  | 8      | 24307939  | Protein Folding                         |
| CCT7                | Chaperonin containing TCP1, subunit 7 (eta)                                          | 577  | 0.026  | 1.36   | <b>E-Ar:</b> FA  |          | 114051425         | <i>Bos Taurus</i>                 | 59       | 161   | 31                  | [142/463] | 12     | 5453607   | Protein folding                         |
| CCT7 <sup>†</sup>   | Chaperonin containing TCP1, subunit 7 (eta)                                          | 581  | 0.011  | 1.31   | <b>IBA:</b> SpD  | 1.19 W   | 126344936         | <i>Monodelphis domestica</i>      | 63       | 103   | 21                  | [120/582] | 8      | 5453607   | Protein folding                         |
| CFL2 <sup>TS</sup>  | Cofilin-2                                                                            | 1727 | 2.E-10 | 7.02   | <b>SA:</b> LT    | 2.76 S   | 14719392          | <i>Homo sapiens</i>               | 19       | 151   | 53                  | [46/86]   | 11     |           | Actin regulation                        |
| CKM                 | Muscle creatine kinase                                                               | 1040 | 0.023  | 1.30   | <b>SA:</b> IBA   |          | 6671762           | <i>Mus musculus</i>               | 43       | 120   | 32                  | [97/301]  | 8      | 21536288  | Phosphocreatine metabolism              |
| CKM                 | Muscle creatine kinase                                                               | 1042 | 0.003  | 1.30   | <b>FA:</b> IBA   |          | 126723370         | <i>Oryctolagus cuniculus</i>      | 43       | 113   | 29                  | [111/381] | 8      | 21536288  | Phosphocreatine metabolism              |
| CKM                 | Muscle creatine kinase                                                               | 1043 | 0.008  | 1.30   | <b>FA:</b> IBA   |          | 126723370         | <i>Oryctolagus cuniculus</i>      | 43       | 161   | 42                  | [127/301] | 11     | 21536288  | Phosphocreatine metabolism              |
| CKM                 | Muscle creatine kinase                                                               | 1044 | 0.021  | 1.52   | <b>FA:</b> Ent   |          | 60097925          | <i>Bos Taurus</i>                 | 43       | 117   | 36                  | [109/301] | 8      | 21536288  | Phosphocreatine metabolism              |
| COQ9                | Coenzyme Q9 ubiquinone biosynthesis protein                                          | 1225 | 0.043  | 1.21   | <b>FA:</b> LT    |          | E: 13571          | <i>Ictidomys tridecemlineatus</i> | 36       | 36    | 12                  | [37/318]  | 3      | 40789233  | Ubiquinone biosynthesis                 |
| CRAT <sup>†</sup>   | Carnitine O-acetyltransferase                                                        | 524  | 0.018  | 1.59   | <b>IBA:</b> SA   | 1.41 W   | 59802828          | <i>Mus musculus</i>               | 71       | 79    | 12                  | [76/626]  | 6      | 21618331  | Fatty acid β-oxidation                  |
| CRAT <sup>‡</sup>   | Carnitine O-acetyltransferase                                                        | 523  | 0.028  |        |                  | 1.28 W   | 59802828          | <i>Mus musculus</i>               | 71       | 97    | 14                  | [85/626]  | 7      | 21618331  | Fatty acid β-oxidation                  |
| DBT <sup>TS</sup>   | Dihydroliipoamide branched chain transacylase E2                                     | 750  | 7.E-10 | 1.59   | <b>SA:</b> IBA   | 1.45 S   | 197097826         | <i>Pongo abelii</i>               | 58       | 66    | 12                  | [53/444]  | 5      | 110671329 | Branched chain amino acid catabolism    |
| DLD                 | Dihydroliipoamide dehydrogenase                                                      | 629  | 0.010  | 1.30   | <b>SA:</b> LT    |          | 62088986          | <i>Homo sapiens</i>               | 54       | 177   | 31                  | [159/509] | 12     |           | Acetyl-CoA biosynthesis from pyruvate   |
| DLST <sup>†</sup>   | Dihydroliipoamide S-succinyltransferase (E2 component of 2-oxo-glutarate complex)    | 734  | 0.032  | 1.17   | <b>SA:</b> LT    | 1.12 S   | E:13084           | <i>Ictidomys tridecemlineatus</i> | 49       | 142   | 19                  | [87/453]  | 9      | 19923748  | Lysine metabolism                       |
| ECHS1               | Mitochondrial short-chain enoyl-coenzyme A hydratase 1 precursor                     | 1414 | 0.018  | 1.31   | <b>SpD:</b> FT   |          | 90076340          | <i>Macaca fascicularis</i>        | 32       | 37    | 4                   | [12/290]  | 3      | 4505369   | Fatty acid β-oxidation                  |
| EC11 <sup>†</sup>   | Dodecenoyl-CoA isomerase                                                             | 1388 | 0.023  | 1.44   | <b>IBA:</b> SA   | 1.23 W   | E: 11815          | <i>Ictidomys tridecemlineatus</i> | 33       | 59    | 19                  | [57/302]  | 4      | 62530384  | Fatty acid β-oxidation                  |
| EEF2 <sup>†</sup>   | Eukaryotic translation elongation factor 2                                           | 212  | 0.003  | 1.71   | <b>E-Ar:</b> SpD | 1.32 W   | 55730085          | <i>Pongo abelii</i>               | 95       | 178   | 18                  | [153/858] | 16     | 4503483   | Translational elongation                |
| EEF2 <sup>†</sup>   | Eukaryotic translation elongation factor 2                                           | 223  | 0.003  | 1.69   | <b>FT:</b> SpD   | 1.34 W   | 4503483           | <i>Homo sapiens</i>               | 95       | 167   | 16                  | [125/778] | 12     |           | Translational elongation                |
| FABP3 <sup>TS</sup> | Fatty acid-binding protein 3, heart                                                  | 1904 | 0.033  | 1.37   | <b>E-Ar:</b> SA  | 1.29 W   | 20138311          | <i>Ictidomys tridecemlineatus</i> | 15       | 41    | 11                  | [14/133]  | 3      | 4758328   | Fatty acid transport                    |
| FABP3 <sup>‡</sup>  | Fatty acid-binding protein 3, heart                                                  | 1865 | 0.009  |        |                  | 1.26 W   | 20138311          | <i>Ictidomys tridecemlineatus</i> | 15       | 68    | 23                  | [30/133]  | 5      | 4758328   | Fatty acid transport                    |
| FABP3 <sup>‡</sup>  | Fatty acid-binding protein 3, heart                                                  | 1892 | 0.018  |        |                  | 1.24 W   | 20138311          | <i>Ictidomys tridecemlineatus</i> | 15       | 74    | 18                  | [24/133]  | 5      | 4758328   | Fatty acid transport                    |
| FABP3 <sup>‡</sup>  | Fatty acid-binding protein 3, heart                                                  | 1903 | 0.005  |        |                  | 1.26 W   | 20138311          | <i>Ictidomys tridecemlineatus</i> | 15       | 81    | 23                  | [30/133]  | 6      | 4758328   | Fatty acid transport                    |
| FAM82B <sup>‡</sup> | Regulator of microtubule dynamics protein 1                                          | 1436 | 0.044  |        |                  | 1.22 W   | 194037093         | <i>Sus scrofa</i>                 | 36       | 71    | 19                  | [61/314]  | 6      | 116875831 | Microtubule binding                     |
| HADHA               | Hydroxyacyl-CoA dehydrogenase/3-ketoacyl-CoA thiolase/enoyl-CoA hydratase, α subunit | 380  | 0.029  | 2.36   | <b>FT:</b> FA    |          | E: 01425          | <i>Ictidomys tridecemlineatus</i> | 83       | 308   | 27                  | [198/739] | 18     | 161086967 | Fatty acid beta-oxidation               |
| HSP90AB1            | Heat shock protein 90kDa α (cytosolic), class B member 1                             | 285  | 0.003  | 1.38   | <b>FT:</b> SA    |          | 6807647           | <i>Homo sapiens</i>               | 85       | 182   | 20                  | [146/737] | 14     |           | Protein folding                         |

|                      |                                                                 |      |        |      |                 |        |           |                                   |     |     |    |            |    |           |                                         |
|----------------------|-----------------------------------------------------------------|------|--------|------|-----------------|--------|-----------|-----------------------------------|-----|-----|----|------------|----|-----------|-----------------------------------------|
| HSPA4 <sup>†§</sup>  | Heat shock 70kDa protein 4                                      | 161  | 5.E-04 | 1.45 | <b>E-Ar:</b> SA | 1.31 W | 38327039  | <i>Homo sapiens</i>               | 94  | 83  | 7  | [53/760]   | 6  |           | Protein folding                         |
| HSPA9                | Stress-70 protein, mitochondrial                                | 438  | 0.026  | 2.00 | <b>FT:</b> SpD  |        | 435839    | <i>Mus musculus</i>               | 73  | 223 | 32 | [214/679]  | 15 | 24234688  | Protein folding                         |
| HSPA9                | Stress-70 protein, mitochondrial                                | 446  | 0.018  | 2.97 | <b>FT:</b> SpD  |        | 14917005  | <i>Mus musculus</i>               | 74  | 77  | 13 | [77/599]   | 6  | 24234688  | Protein folding                         |
| HSPA9                | Stress-70 protein, mitochondrial                                | 453  | 0.023  | 3.44 | <b>FT:</b> SpD  |        | 14917005  | <i>Mus musculus</i>               | 74  | 40  | 6  | [37/599]   | 3  | 24234688  | Protein folding                         |
| HSPB2                | Heat shock 27 kDa protein 2                                     | 1614 | 0.011  | 1.37 | <b>SpD:</b> FA  |        | 149716491 | <i>Equus caballus</i>             | 20  | 47  | 29 | [52/182]   | 3  | 4504519   | Response to heat stress                 |
| HSPB6                | Heat shock protein, $\alpha$ -crystallin-related, $\beta$ -6    | 1709 | 0.037  | 1.48 | <b>IBA:</b> SA  |        | E: 08172  | <i>Ictidomys tridecemlineatus</i> | 17  | 46  | 24 | [38/160]   | 4  | 21389433  | Cardioprotection from I/R injury        |
| KBTBD10 <sup>†</sup> | Ke1-like protein 23                                             | 442  | 0.021  | 1.38 | <b>LT:</b> SA   | 1.26 W | 57110617  | <i>Canis familiaris</i>           | 68  | 240 | 22 | [133/606]  | 14 | 42741669  | Protein catabolic process               |
| LDHB                 | Lactate dehydrogenase B                                         | 1178 | 0.043  | 1.36 | <b>FA:</b> Ent  |        | 109114055 | <i>Macaca mulatta</i>             | 37  | 199 | 45 | [150/334]  | 14 | 291575128 | Glucose catabolic process               |
| LONP1                | Lon protease-like protein                                       | 200  | 0.011  | 1.24 | <b>FA:</b> LT   |        | 429100    | <i>Homo sapiens</i>               | 104 | 110 | 12 | [105/857]  | 8  |           | Response to oxidative stress            |
| LONP1                | Lon protease-like protein                                       | 206  | 0.017  | 1.28 | <b>FT:</b> Ent  |        | 429100    | <i>Homo sapiens</i>               | 104 | 79  | 7  | [64/857]   | 6  |           | Response to oxidative stress            |
| MDH1                 | Cytosolic malate dehydrogenase                                  | 1162 | 0.026  | 1.22 | <b>FA:</b> Ent  |        | 387129    | <i>Mus musculus</i>               | 36  | 81  | 25 | [63/254]   | 6  | 5174539   | Pyruvate metabolism                     |
| NDUFS1               | NADH dehydrogenase (ubiquinone) Fe-S protein 1                  | 352  | 0.039  | 1.38 | <b>FT:</b> LT   |        | 67970033  | <i>Macaca fascicularis</i>        | 80  | 179 | 20 | [144/727]  | 12 | 33519475  | Oxidative phosphorylation               |
| NDUFS4               | NADH dehydrogenase [ubiquinone] iron-sulfur protein 4           | 1685 | 0.011  | 1.36 | <b>SA:</b> E-Ar |        | 28461229  | <i>Bos Taurus</i>                 | 20  | 112 | 43 | [41/95]    | 7  | 4505369   | Oxidative phosphorylation               |
| OGDH                 | Oxoglutarate dehydrogenase (lipoamide)                          | 201  | 0.045  | 1.30 | <b>FT:</b> LT   |        | 149047673 | <i>Rattus norvegicus</i>          | 118 | 289 | 22 | [223/1034] | 20 | 51873036  | Glucose metabolism                      |
| OXCT1 <sup>†</sup>   | 3-Oxoacid CoA transferase 1                                     | 691  | 0.006  | 1.78 | <b>Ent:</b> SA  | 1.50 W | 4557817   | <i>Homo sapiens</i>               | 56  | 58  | 8  | [35/440]   | 4  |           | Lipid metabolism                        |
| OXCT1 <sup>†</sup>   | 3-Oxoacid CoA transferase 1                                     | 692  | 0.011  | 1.57 | <b>Ent:</b> SA  | 1.35 W | 4557817   | <i>Homo sapiens</i>               | 56  | 97  | 15 | [68/440]   | 7  |           | Lipid metabolism                        |
| OXCT1 <sup>†§</sup>  | 3-Oxoacid CoA transferase 1                                     | 700  | 0.002  | 1.84 | <b>Ent:</b> SA  | 1.54 W | 109077088 | <i>Macaca mulatta</i>             | 56  | 101 | 20 | [86/440]   | 7  | 4557817   | Lipid metabolism                        |
| PARK7                | Protein DJ-1                                                    | 1660 | 0.048  | 1.38 | <b>FT:</b> IBA  |        | 149695427 | <i>Equus caballus</i>             | 20  | 59  | 24 | [45/189]   | 5  | 31543380  | Response to oxidative stress            |
| PCBP1 <sup>†</sup>   | Poly(rC) binding protein 1                                      | 1087 | 0.002  | 1.53 | <b>SA:</b> IBA  | 1.25 S | 460771    | <i>Homo sapiens</i>               | 38  | 40  | 11 | [38/356]   | 3  |           | RNA splicing                            |
| PCCA <sup>†</sup>    | Propionyl Coenzyme A carboxylase, $\alpha$ polypeptide          | 425  | 0.001  | 1.37 | <b>SA:</b> LT   | 1.18 S | 73989252  | <i>Canis familiaris</i>           | 81  | 243 | 29 | [209/731]  | 17 | 189095269 | Lipid metabolism                        |
| PDHA1 <sup>†</sup>   | Pyruvate dehydrogenase E1 component $\alpha$ subunit            | 976  | 0.011  | 1.95 | <b>IBA:</b> SA  | 1.56 W | 74006565  | <i>Canis familiaris</i>           | 40  | 113 | 23 | [82/359]   | 8  | 4505685   | TCA cycle                               |
| PDHB                 | Pyruvate dehydrogenase (lipoamide) $\beta$                      | 1218 | 0.020  | 1.51 | <b>LT:</b> FA   |        | 156564403 | <i>Homo sapiens</i>               | 39  | 50  | 6  | [16/279]   | 3  |           | TCA cycle                               |
| PDHB                 | Pyruvate dehydrogenase (lipoamide) $\beta$                      | 1221 | 0.021  | 1.30 | <b>SpD:</b> FT  |        | 156564403 | <i>Homo sapiens</i>               | 39  | 75  | 14 | [38/279]   | 5  |           | TCA cycle                               |
| PDHB <sup>†</sup>    | Pyruvate dehydrogenase (lipoamide) $\beta$                      | 1343 | 0.007  | 2.16 | <b>FT:</b> SpD  | 1.78 W | 73985155  | <i>Canis familiaris</i>           | 37  | 32  | 9  | [32/341]   | 2  | 156564403 | TCA cycle                               |
| PDHX <sup>†</sup>    | Pyruvate Dehydrogenase Protein X                                | 748  | 0.018  | 1.23 | <b>SpD:</b> LT  | 1.16 S | 90075986  | <i>Macaca fascicularis</i>        | 54  | 50  | 9  | [46/501]   | 4  | 203098753 | TCA cycle                               |
| PDIA3                | Protein disulfide isomerase family A, member 3                  | 647  | 0.018  | 1.71 | <b>LT:</b> FA   |        | 217030873 | <i>Oryctolagus cuniculus</i>      | 56  | 222 | 39 | [195/502]  | 16 | 21361657  | ER glycoprotein folding                 |
| PDP1 <sup>†</sup>    | Pyruvate dehydrogenase phosphatase                              | 643  | 0.046  | 1.38 | <b>E-Ar:</b> SA | 1.30 W | 73999591  | <i>Canis familiaris</i>           | 82  | 174 | 18 | [130/738]  | 11 | 45439339  | Regulation of Pyruvate dehydrogenase    |
| PPP2R1A              | $\alpha$ Isoform of regulatory subunit A, protein phosphatase 2 | 493  | 0.017  | 1.27 | <b>FT:</b> Ent  |        | 21361399  | <i>Homo sapiens</i>               | 65  | 111 | 23 | [117/509]  | 9  |           | Regulation of cell growth               |
| SDHA                 | Succinate dehydrogenase Fp subunit                              | 463  | 0.036  | 1.30 | <b>FT:</b> IBA  |        | 54607098  | <i>Mus musculus</i>               | 73  | 152 | 25 | [147/584]  | 11 | 156416003 | Acetyl-CoA metabolic process            |
| STOML2               | Stomatin-like protein 2                                         | 1028 | 0.045  | 1.44 | <b>FT:</b> SpD  |        | E: 13653  | <i>Ictidomys tridecemlineatus</i> | 39  | 42  | 14 | [50/356]   | 3  | 7305503   | Mitochondrial sodium/calcium exchange   |
| SUCLG2               | Succinate-CoA ligase, GDP-forming $\beta$ -subunit              | 877  | 0.010  | 1.42 | <b>Ent:</b> FT  |        | 291393975 | <i>Oryctolagus cuniculus</i>      | 47  | 86  | 14 | [60/432]   | 7  | 157779135 | Succinyl-CoA metabolism                 |
| TCP1 <sup>†</sup>    | T-complex protein 1 subunit $\alpha$ isoform a                  | 609  | 0.002  |      |                 | 1.14 W | 186973225 | <i>Oryctolagus cuniculus</i>      | 60  | 123 | 19 | [107/556]  | 9  | 57863257  | Protein Folding                         |
| TF                   | Transferrin                                                     | 333  | 0.038  | 2.34 | <b>FT:</b> IBA  |        | 30909317  | <i>Marmota monax</i>              | 76  | 144 | 15 | [104/694]  | 11 | 4557871   | Iron ion transport                      |
| TTR <sup>†§</sup>    | Transthyretin precursor                                         | 1878 | 0.011  | 2.72 | <b>FT:</b> IBA  | 1.76 S | E: 06729  | <i>Ictidomys tridecemlineatus</i> | 16  | 50  | 35 | [51/147]   | 4  | 4507725   | Thyroid hormone transmembrane transport |
| YWHAQ <sup>†§</sup>  | 14-3-3 Protein $\theta$ isoform 3                               | 1314 | 6.E-06 | 1.39 | <b>IBA:</b> SA  | 1.28 W | 73979716  | <i>Canis familiaris</i>           | 25  | 32  | 11 | [25/229]   | 2  | 5803227   | Inhibition of apoptosis                 |

Spots uniquely identified based on the criteria detailed in methods are listed. Columns are: official symbol (gene), protein identification of match (ID), spot number on master gel (Spot), False Discovery Rate adjusted p-value ( $q$ ), greatest fold change between mean spot abundances of any two groups (Fold  $\Delta$ ), groups that produced greatest fold change (Fold stage, group in bold has higher mean abundance), fold change between summer homeothermic and winter heterothermic groups for  $t$ -test significant spots (Season  $\Delta$ , W or S indicates abundance is elevated in winter or summer groups, respectively), NCBI GenInfo Identifier or Ensembl protein identifier (GI or Ensembl No.; E: abbreviated for Ensembl protein prefix ENSSTOP000000), species for this GI (Species), molecular mass for this GI (MW, kDa), Spectrum Mill protein score (Score), percent of amino acid coverage (%), ratio of quantity of recovered amino acids over total amino acids (Ratio), number of distinct peptides matched (# pep.), human homolog NCBI GenInfo Identifier (Human), possible function based on NCBI "Gene" information (Function); TCA cycle, tricarboxylic acid cycle; ER, endoplasmic reticulum. Within Gene column: † indicates protein significant by both ANOVA and  $t$ -test –  $q$  reflects ANOVA adjusted  $p$ -value; ‡ indicates protein significant by  $t$ -test only –  $q$  reflects  $t$ -test adjusted  $p$ -value; § indicates top Random Forests identifier (Fig. 4); otherwise, spots significant by ANOVA.
